# Supplementary material for: Electric current as a stabilizing thermodynamic field in metallic crystals
Source: Research Square preprint supplement (doi:10.21203/rs.3.rs-8306076/v1), 2026-01-12
Supplement: Supplementary file 1 [file 40f109164950d103081163d8.docx]

**Electric current as a stabilizing thermodynamic field in metallic crystals**

Shubhayan Mukherjee1, Wan-Zhen Hsieh7, Yu-chen Liu3-6, Ching-Yu Chiang7, Shang-Jui Chiu7, Jun Mizuno6, Shih-kang Lin1-5, *

1 Department of Materials Science and Engineering, National Cheng Kung University, Tainan 70101, Taiwan;

2 Center for Resilience and Intelligence on Sustainable Energy Research (RiSER), National Cheng Kung University, Tainan 70101, Taiwan;

3 Hierarchical Green-Energy Materials (Hi-GEM) Research Centre, National Cheng Kung University, Tainan 70101, Taiwan;

4 Academy of Innovative Semiconductor and Sustainable Manufacturing, National Cheng Kung University, Tainan, Taiwan;

5 Core Facility Center, National Cheng Kung University, Tainan 70101, Taiwan;

6 Department of Mechanical Engineering, National Cheng Kung University, Tainan, Taiwan;

7 National Synchrotron Radiation Research Center, Hsinchu 30076, Taiwan.

[*linsk@mail.ncku.edu.tw](mailto:*linsk@mail.ncku.edu.tw)

# **Supplementary Table of Contents**

Supplementary Discussion

Electron-wind thermodynamics and lattice stability

Energy partition between elastic and plastic components

Temporal stability and reversibility of the elastic-freezing regime

Comparative analysis with η'-Cu6Sn5

Implications for current-assisted thermodynamics

Relevance to defect dynamics and mechanical analogy

Supplementary Notes

Sample Preparation

Thermal Aging and Electric Current Stressing (ECS)

Structural Characterization

Ex-situ Microstructural Analysis

Supplementary Figures (Figs. 1 - 11)

Supplementary Tables (Tables 1 - 5)

Supplementary References

# **Supplementary Discussion**

*Electron-wind thermodynamics and lattice stability*

Early theoretical analyses by Dolinsky and Elperin treated electric current as a non-classical thermodynamic variable that contributes an additional work term () to the Gibbs free energy [1, 2]. Their model predicted that a steady electronic flux could bias phase equilibria by coupling electronic momentum to lattice strain. The present work provides direct structural evidence for this coupling: the measured electron-wind stress ( ≈ 30–40 MPa) and elastic-strain-energy density (Uelastic ≈ 9–12 MJ m⁻3) reproduce the magnitude of electronic work predicted from . To account for uncertainty in the effective charge number, we considered variations in *Z** between 8 and 12. The corresponding range (25-45 MPa) remains within the experimental uncertainty of the SR-XND measurements, confirming the robustness of the stress-energy linkage.

Under this flux, the η-Cu6Sn5 lattice accommodates momentum anisotropically rather than reconstructing. Expansion along ⟨0001⟩ and compression in the basal planes redistribute stress without creating new interfaces, representing an electronic analogue of pressure-induced anisotropic elasticity. Because the total Uelastic remains nearly two orders of magnitude below the reconstructive barrier (~150 MJ m⁻3) [3, 4], the electronic perturbation is confined to the elastic regime, producing a reversible “freezing” of atomic motion.

This experimentally validates Dolinsky and Elperin’s concept of an athermal current field that alters the local curvature of the Gibbs surface. The agreement between theoretical σew and the experimentally derived value from SR-XND maps demonstrates that the term acts as a stabilizing contribution rather than a destabilizing one, in contrast to classical electromigration theory that assumes momentum transfer always promotes atomic flux.

*Energy partition between elastic and plastic components*

The total energy accumulated under current stressing can be decomposed as

(1)

Elastic energy, obtained from measured strain (ε ≈ 1–1.5 %), is 9–12 MJ m⁻3, while any possible plastic dissipation inferred from the change in dislocation density (Δρ ≈ –13 % on (002) planes) is below 1 MJ m⁻3. Consequently, exceeds 90 %, confirming that the deformation is overwhelmingly reversible. The measured decrease in full-width-at-half-maximum (FWHM) after current removal and the reduction in ρ(002) both indicate partial stress release and enhanced coherence, consistent with a small but finite fraction of plastic relaxation acting as the recovery channel.

The elastic component thus dominates energy storage, defining an elastic-freezing domain bounded by ≈ 30–40 MPa. Within this domain, incremental current increases result in proportional elastic strain without crossing the yield threshold. The proportionality between and (Hookean within uncertainty) confirms that no permanent microstructural reconfiguration occurs until *J* exceeds approximately 104 A cm⁻2 [5].

*Temporal stability and reversibility of the elastic-freezing regime*

The reversibility of lattice strain after current cessation (η6-5e-RT) was evaluated after cooling to room temperature using SR-XRD and SR-XND. The (002) peak partially relaxed from its maximum expansion (+1.3 %) to +0.23 %, while no further shift or additional broadening was detected once the sample reached ambient temperature. This partial recovery indicates that most of the electron-wind-induced distortion is elastically reversible, whereas a small residual strain remains frozen after current removal. The absence of time-dependent relaxation beyond the cooling stage confirms that the retained elastic state represents a metastable equilibrium rather than a transient artefact.

*Comparative analysis with η'-Cu6Sn5*

The contrasting response of η'-Cu6Sn5 under identical electric-current stressing provides critical insight into the role of lattice symmetry [6-8]. In the metastable monoclinic η' phase, ECS at 1.5 × 103 A cm⁻2 and ~120 °C for 5 h drives a reconstructive η' → η transition far below the equilibrium temperature, illustrating that electronic momentum can activate transformation when atomic rearrangement is kinetically accessible. The same current applied for the same duration to the stable η phase does not induce further transformation but freezes the structure elastically.

This inversion arises from the difference in atomic packing and electron–phonon coupling [9, 10]. The hexagonal η lattice exhibits stronger coupling and a lower density of open channels, confining the injected momentum to local vibrational modes that manifest as elastic strain. In contrast, the monoclinic lattice provides multiple low-symmetry slip systems that translate the same momentum into collective atomic motion. Together, these two regimes delimit a current-induced stability map for Cu–Sn intermetallics:

- η' phase: current reduces free-energy barrier → reconstructive activation.
- η phase: current increases effective stiffness → elastic stabilization.

This duality emphasizes that electric current does not universally destabilize solids but interacts with lattice symmetry to define the direction of structural evolution.

*Implications for current-assisted thermodynamics*

By integrating experimental stress–strain–energy relations with theoretical thermodynamics, the free energy of a current-carrying crystal can be generalized as [1, 11]

(2)

The conjugate potential scales with , representing the reversible work associated with electronic momentum transfer. In the η-Cu6Sn5 system, ≈ 10⁻4 J cm⁻3 A⁻1, a sufficient magnitude could bias equilibrium conditions by several kelvin within operational current ranges. Lin et al.’s CALPHAD calculations predicted a similar order of magnitude for current-induced Gibbs-energy modification, suggesting that the present structural observations represent a direct microscopic realization of that model [12].

Such coupling implies that electronic transport can tune the relative stability of polymorphs without altering temperature or pressure. Defining phase boundaries in *T––J* space offers a predictive route for designing current-resilient interconnects and for extending current-field thermodynamics to other systems, including metallic glasses and ordered alloys.

*Relevance to defect dynamics and mechanical analogy*

The reversible dislocation rearrangement observed here parallels stress-induced recovery in mechanically loaded metals. However, in the electronic case, defect motion is driven by momentum exchange with charge carriers rather than by external stress gradients. The selective unpinning of dislocations on (002) planes align with the direction of electron flow, consistent with the polarity dependence of electron-wind drag [13-15]. The relaxation that follows current removal mirrors cyclic stress recovery in fatigue-resistant alloys, implying that controlled electrical stressing may be used as a non-thermal route for defect annealing.

# **Supplementary Notes**

## *Sample Preparation*

Stoichiometric Cu6Sn5 alloy was synthesized from high-purity Cu (99.9%, Alfa Aesar) and Sn (99.9%, Alfa Aesar) pellets by arc melting (MAM1, Edmund Bühler) under an Ar atmosphere. Each ingot was remelted five times to ensure chemical homogeneity and minimize Sn-evaporation gradients. The as-cast ingots were vacuum-annealed (∼10-5 Pa) using a vertical furnace at 300 °C for 24 h to stabilize the high-temperature hexagonalη-phase (Fig. 1a), followed by a secondary anneal at 250 °C for 6 h to promote phase homogeneity. Rapid water-quenching to room temperature preserved the η-phase and suppressed η′/η′' formation during cooling. The resulting samples (denoted η6) were mechanically polished to a mirror finish (Ra < 0.05 µm) prior to treatment.

## *Thermal Aging and Electric Current Stressing*

To isolate electric-field effects from pure thermal aging, η6 samples were divided into two series:

(i) Thermal aging at 130 °C for up to 5 h in an ambient atmosphere (η6-LT series).

(ii) Electric current stressing (ECS) at a current density of 1.5 × 103 A/cm2 for 1–5 h (η6-e series).

The 130 °C temperature corresponds to the steady-state Joule-heating condition during ECS, verified by real-time thermocouple measurements (Fig. 1d). Current was applied by a programmable DC source (Keithley 3500) through a custom-built stage that allowed simultaneous current flow and in-situ diffraction (Fig. 1b). Supplementary Fig. 1 summarizes the experimental process flow, showing the post-annealing sequence and confirming Joule-heating equivalence between the thermal and ECS series. The full nomenclature of sample conditions is summarized in Supplementary Table S1.

## *Structural Characterization*

Phase verification of the as-prepared η-Cu6Sn5 was carried out by powder X-ray diffraction (PXRD, Bruker D8 ADVANCE, Cu Kα radiation λ = 1.5406 Å) over 20° ≤ 2θ ≤ 55° with a step size of 0.013° and a scan rate of 4° min⁻¹. The PXRD system and configuration are identical to those previously reported for η-Cu6Sn5 prepared under similar conditions [6], and they confirm a phase-pure hexagonal structure (COD #01-071-5036).

Bulk structural evolution of the η6 sample was observed using in-situ SR-XRD at TLS BL17B1 (NSRRC, Taiwan) using 8 keV X-rays (λ = 1.55 Å) over the same 2θ range (step 0.002° s-1). This confirmed the η phase before stressing, whereas shorter in-situ scans (step 0.04°) captured the diffraction evolution during ECS (η6-1e → η6-5e) and after current cessation (η6-5e-RT). For comparison with standard PDF cards, all SR-XRD patterns were converted to Cu Kα-equivalent wavelength (λ = 1.5406 Å). All ECS measurements used a custom sample stage maintaining continuous current flow during acquisition (Fig. 1b). Phase identification used reference peak lists for η (COD #01-071-5036) and η' (COD #01-081-8261). η'' was not included in the Rietveld model because no characteristic η'' peaks were observed above background; based on signal-to-noise and peak widths, the practical detection limit is ≈1–2 vol.% under our acquisition conditions.

Grain-resolved strain and stress fields were mapped by in-situ SR-XND at TPS BL21A (NSRRC, Hsinchu), optimized for high-resolution Laue mapping in bulk samples. A polychromatic beam was focused to ~80 nm and rastered with a 5 µm lateral step to resolve grain-scale lattice distortion in η-Cu6Sn5. Three sequential scans were performed: (i) η6 at 0 h, (ii) in-situ monitoring during 5 h ECS (η6-1e → η6-5e; 1.5 × 103 A/cm2), and (iii) post-ECS at room temperature (η6-5e-RT). Laue patterns were indexed with XMAS (version 6) [16-18], enabling extraction of full strain tensors and crystallographic orientations at sub-micron resolution for high-fidelity intragranular stress/strain maps.

## *Ex-situ Microstructural Analysis*

Surface morphology were confirmed by scanning electron microscopy (SEM, SU3500, Hitachi, Japan) on the as-prepared η-Cu6Sn5 sample prior to thermal annealing to confirm surface homogeneity. Transmission electron microscopy (TEM, JEOL JEM-2100F, Japan) was used on pre- and post-ECS η6 samples (η6 and η6-5e-RT, respectively) to acquire selected area electron diffraction (SAED) patterns along the [101] and [0001] zone axes and high-resolution TEM (HR-TEM) images for dislocation analysis. TEM lamellae were prepared by focused ion beam (FIB, FEI NOVA 200, Thermo Fisher, USA) milling. Areal dislocation density (ρ) was quantified from HR-TEM lattice-fringe images using the Fourier-filtering method. Each image was fast-Fourier-transformed (FFT); a single reflection g and its Friedel pair were selected based on the corresponding SAED pattern. A circular mask at g suppressed other frequencies, and inverse FFT (IFFT) yielded g-filtered images where dislocation cores appear as fringe terminations. For each condition, 8-12 non-overlapping windows of known area were analyzed from uniform-contrast regions; dislocation cores were manually annotated. Repeated counts across multiple lamellae gave a ± 2–3 % uncertainty.

# **Supplementary Figures**


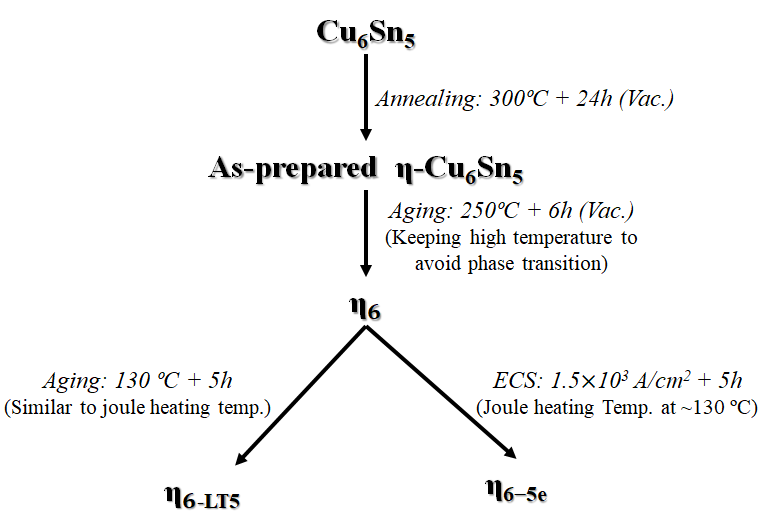


Supplementary Fig. 1. Experimental flow of sample preparation and treatment conditions. Schematic representation of the processing routes used to obtain η-Cu6Sn5 specimens for thermal and electrical stressing. The as-prepared η phase was obtained after vacuum annealing at 300 °C for 24 h and stabilization at 250 °C for 6 h to homogenize the η-phase. The η6 series was subjected either to 130 °C thermal aging for 5 h (η6-LT5) or to electric-current stressing (ECS) at 1.5 × 103 A cm⁻2 for 5 h, reaching an equivalent temperature of ~130 °C. This flow ensures identical thermal exposure between current-driven and purely thermal conditions, isolating the effect of the electron wind.


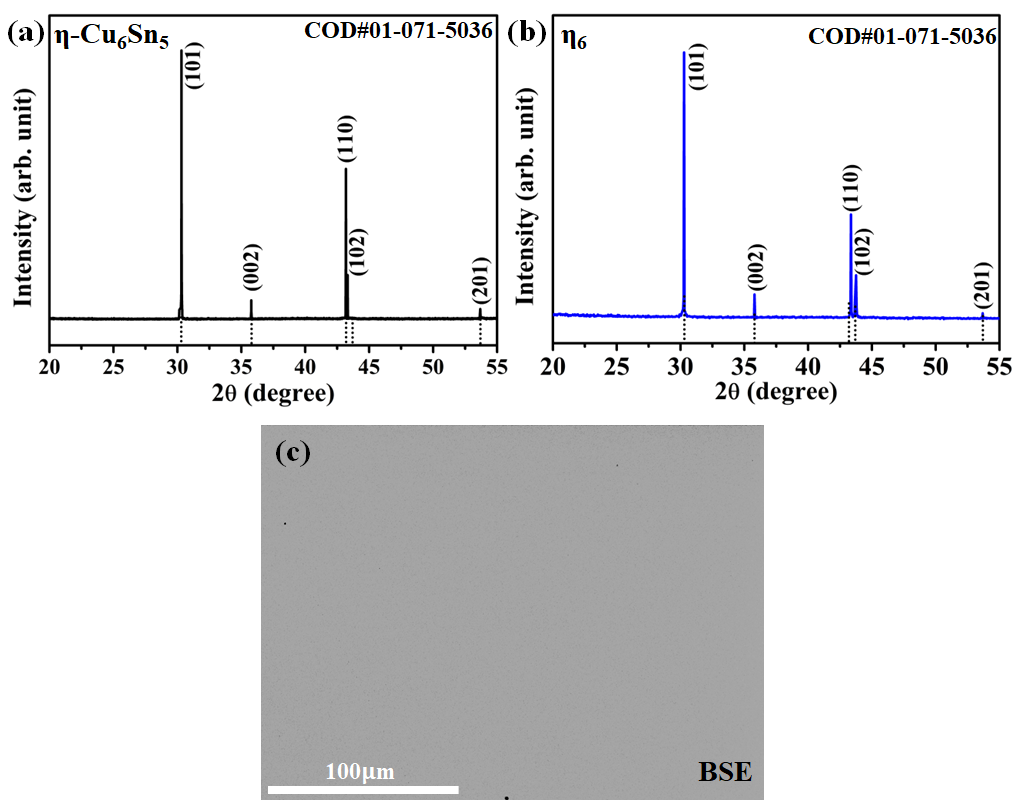


Supplementary Fig. 2. Structural and microstructural verification of as-prepared η-Cu6Sn5. SR-XRD pattern of the (a) as-prepared η phase and (b) η6-sample, indexed to COD #01-071-5036, shows only (101), (002), (110), (102), and (201) reflections of the hexagonal phase. (c) BSE micrograph displays uniform contrast without secondary phases or compositional inhomogeneity. These results confirm a single-phase, compositionally uniform η-Cu6Sn5 starting material.


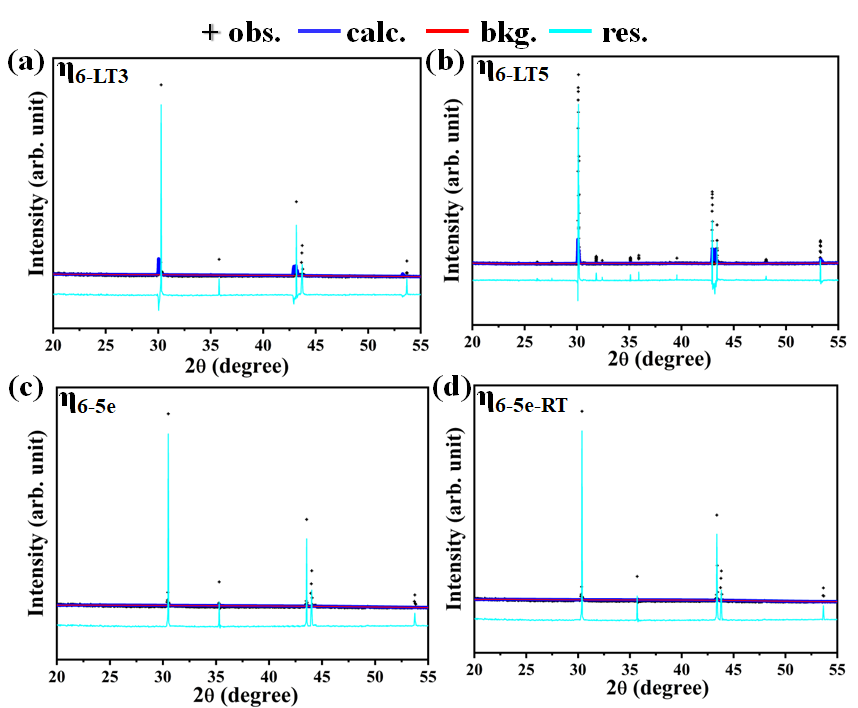


Supplementary Fig. 3. Rietveld refinements of η-Cu6Sn5 under thermal and electrical treatments. Rietveld-refined SR-XRD patterns for (A) η6–LT3, (B) η6–LT5, (C) η6–5e, and (D) η6–5e–RT. Refinements quantify the η/η' phase fractions reported in Supplementary Table S2 and confirm that electric-current stressing preserves ~100% η, whereas thermal aging promotes η' formation.


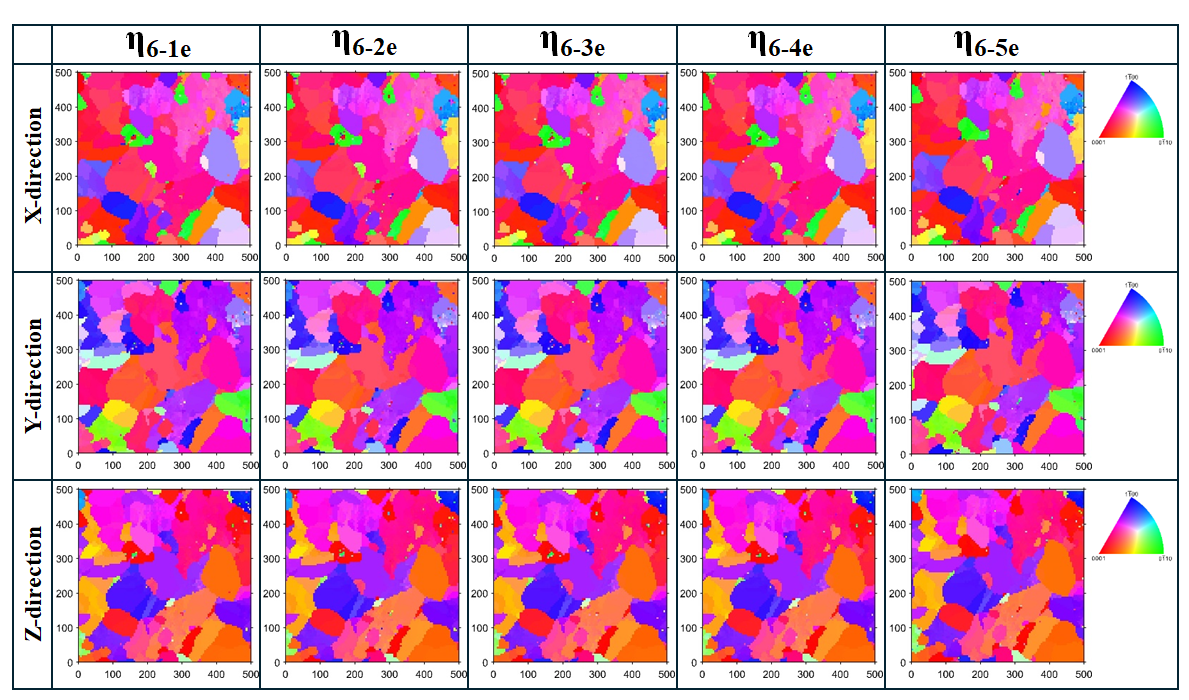


Supplementary Fig. 4. Grain-orientation stability during electric-current stressing. SR-XND orientation maps of the η6 series along X-, Y-, and Z-directions at 1–5 h ECS. No orientation drift or grain rotation is detected, confirming that the lattice response under current arises from intrinsic anisotropic strain rather than texture evolution.


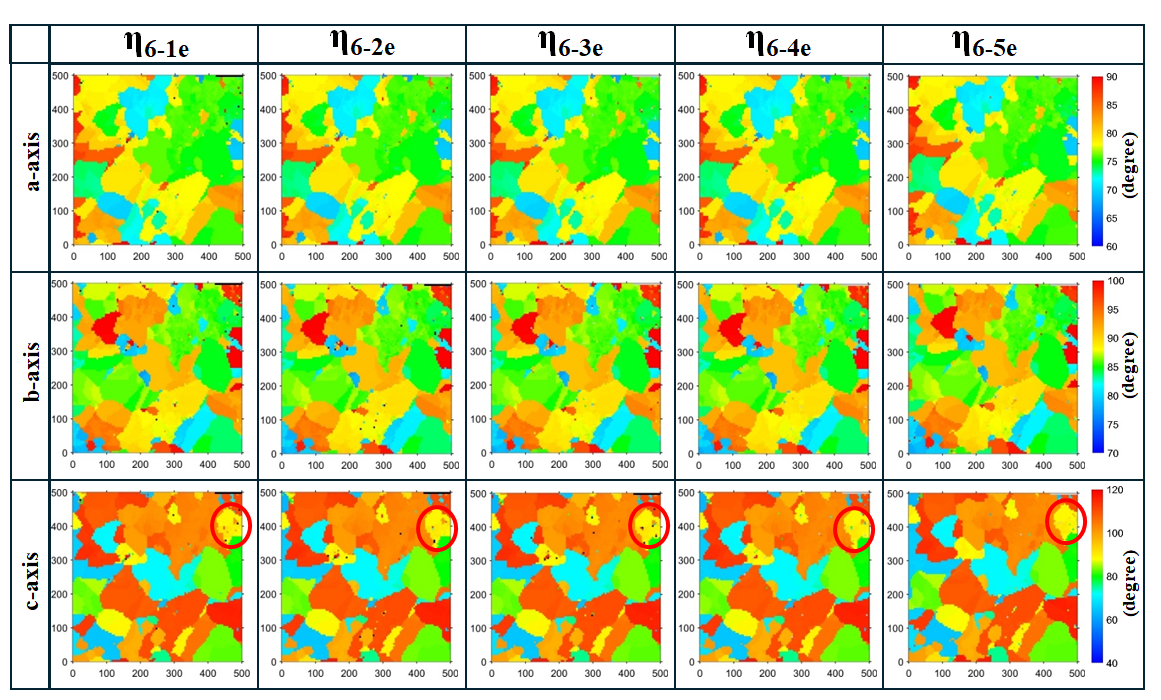


Supplementary Fig. 5. Axis-angle distributions of η-Cu6Sn5 grains during ECS. Angle-mapping of a-, b-, and c-axes for 1–5 h ECS. Red circles highlight representative grains whose minor orientation variance is observed. The average c-axis angle remains constant within ±0.1°, verifying orientation invariance during current stressing.


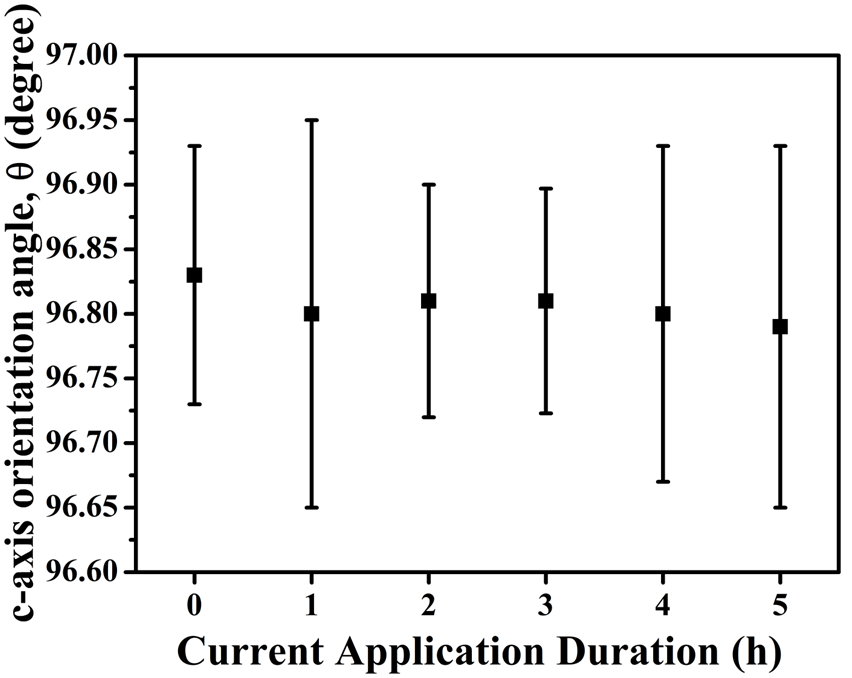


Supplementary Fig. 6. Quantitative c-axis orientation stability. Variation of ⟨0001⟩ orientation angle θ with ECS duration (0–5 h). The mean θ ≈ 96.8° ± 0.1° shows no measurable drift. These results corroborate that current-induced strain develops without any significant grain re-orientation.


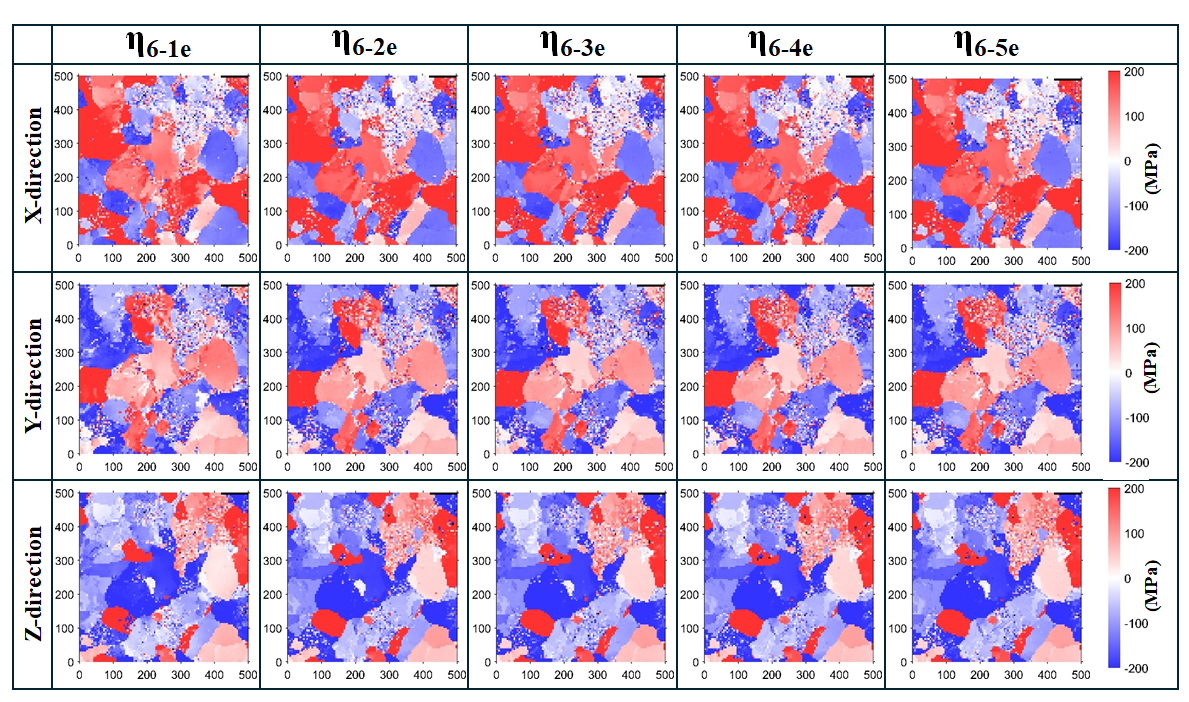


Supplementary Fig. 7. Time-resolved deviatoric-stress evolution during ECS. Grain-resolved deviatoric-stress maps of η6 obtained by in-situ SR-XND during 1–5 h of ECS along X-, Y-, and Z-directions. Anisotropic stress fields (±200 MPa) progressively develop along the current direction, consistent with electron-wind-induced stress generation.


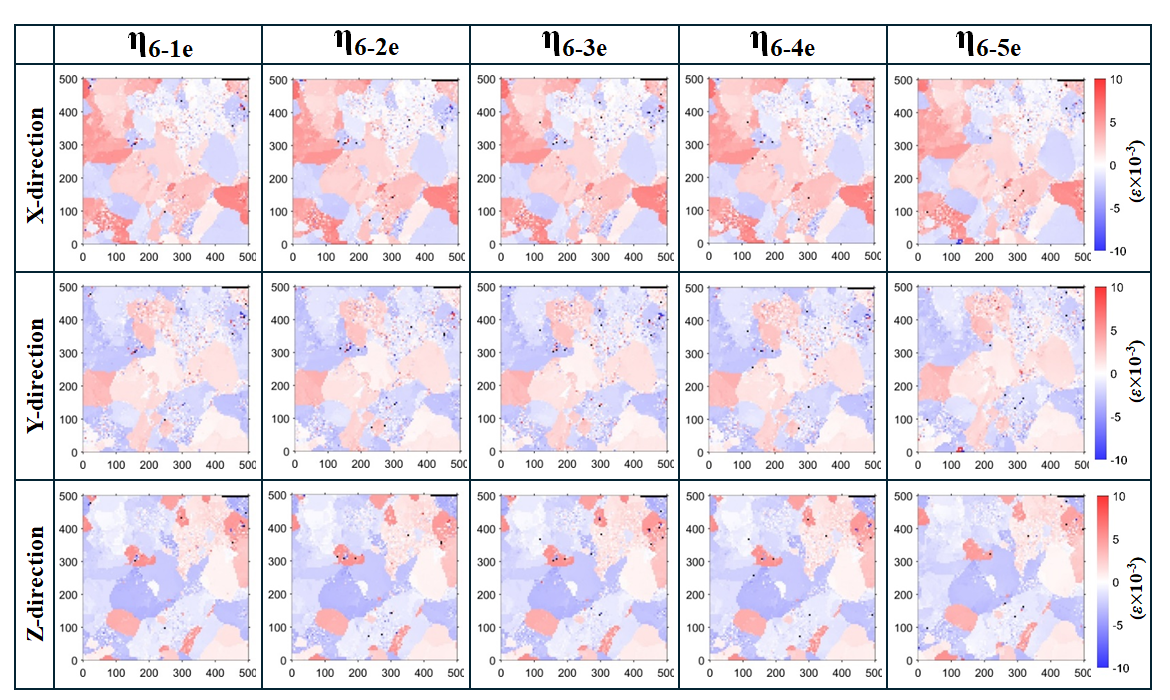


Supplementary Fig. 8. Time-resolved deviatoric-strain evolution during ECS. Corresponding deviatoric-strain maps (±6 × 10⁻3) of the same regions in Supplementary Fig. 7. Strain anisotropy mirrors the stress field, demonstrating reversible elastic deformation confined within individual grains.


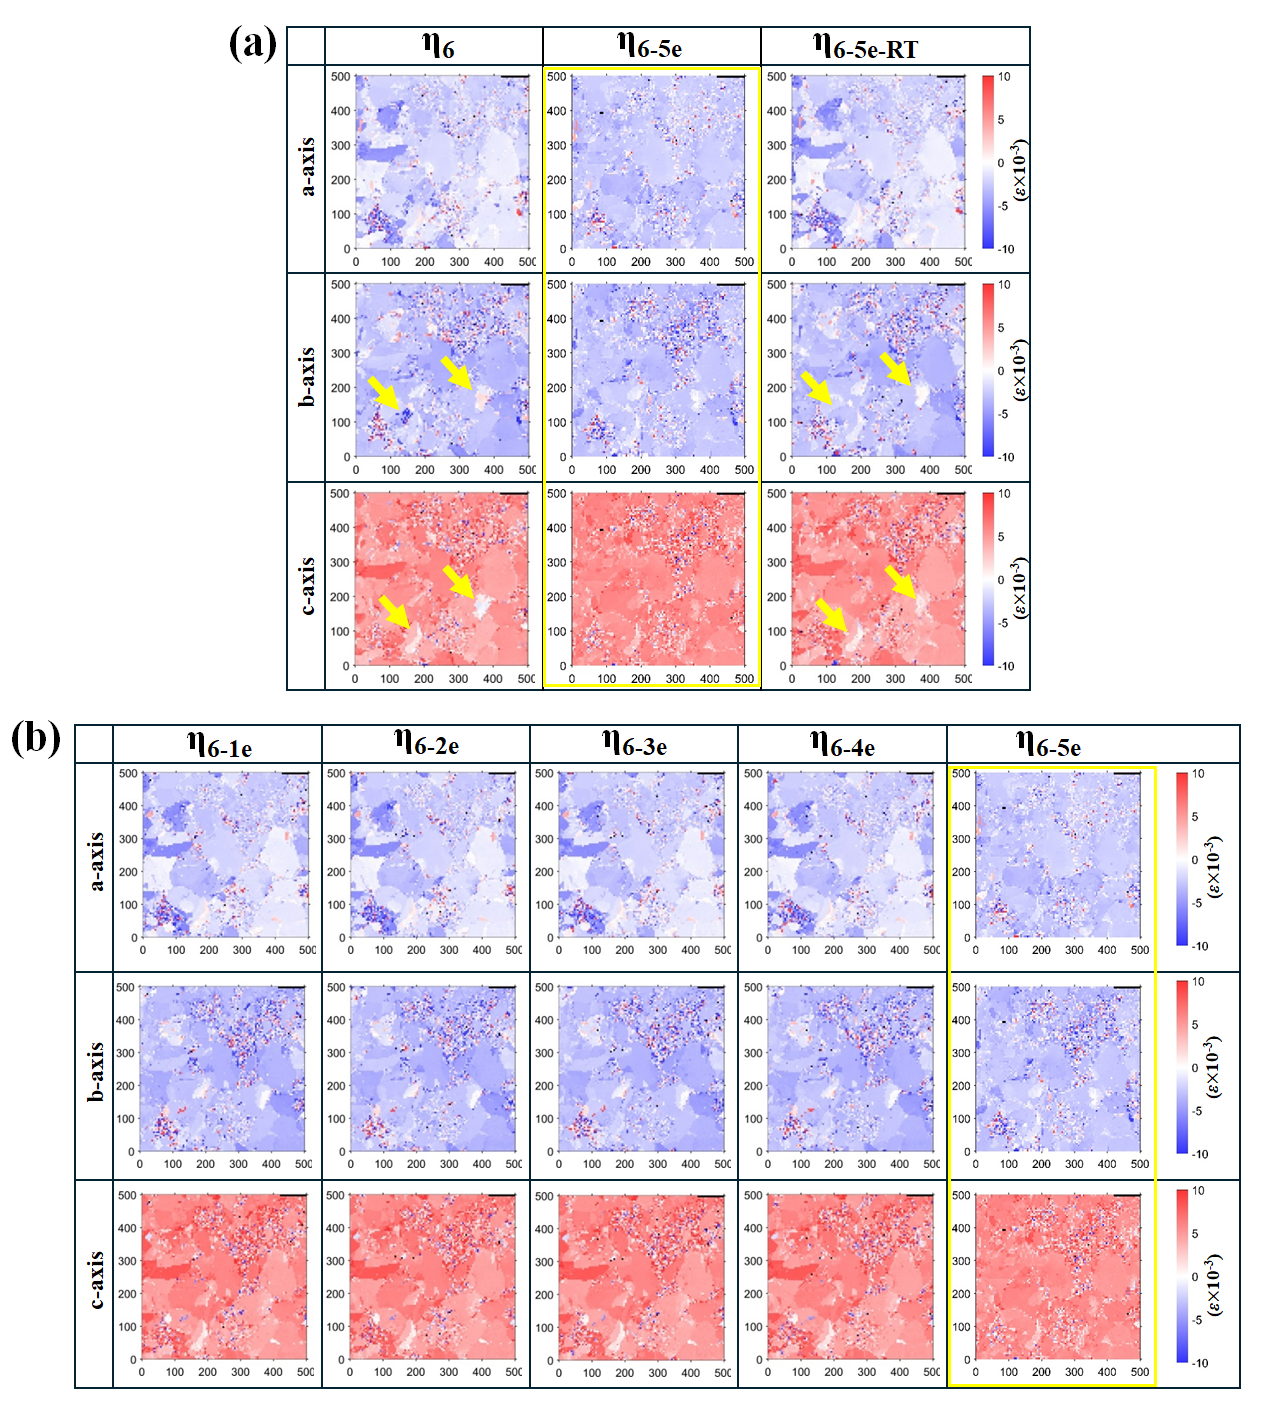


Supplementary Fig. 9. Axis-resolved strain mapping before, during, and after ECS. (a) Principal-axis strain maps for η6, η6-5e, and η6-5e-RT; yellow arrows indicate tensile regions along ⟨0001⟩ and compressive regions along a/b axes. (b) Time-resolved strain evolution (1–5 h) for each axis. Tensile strain (+1.3 %) along the c-axis and compressive strain (–0.8 %) within basal planes confirm directional elastic accommodation under current flow.


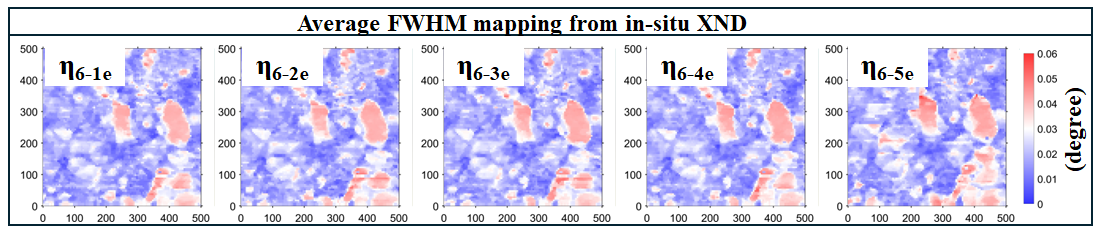


Supplementary Fig. 10. Average FWHM evolution during in-situ SR-XND mapping. Spatial FWHM maps for η6–1e → η6–5e show negligible broadening during ECS, within 0.01–0.06°. The minimal decrease in FWHM indicates that average crystal coherence is improved slightly in post-ECS, consistent with an elastic deformation regime.


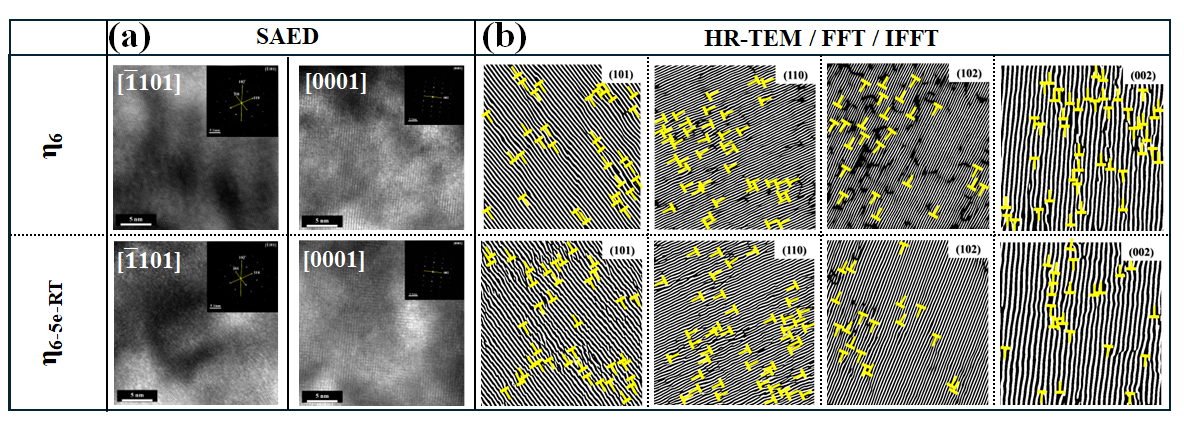


Supplementary Fig. 11. Structural and defect evolution before and after current stressing. (a) SAED patterns of η6 and η6-5e-RT along [101] and [0001] zone axes retain the hexagonal symmetry. (b) HR-TEM/FFT/IFFT images reveal dislocation configurations on (101), (110), (102), and (002) planes; yellow T-marks indicate dislocation cores. Post-ECS samples show reduced dislocation density and improved lattice coherence, corroborating reversible defect rearrangement upon elastic relaxation.

# **Supplementary Tables**

Supplementary Table 1: Nomenclature of the η-Cu6Sn5 samples under different conditions. As-prepared η-phase (η6) was obtained after 250 °C, 6 h vacuum aging. Subsequent thermal aging at 130 °C (1–5 h) yielded η6-LT1–5, while electric current stressing (1.5 × 103 A cm⁻2, 1–5 h) produced η6-1e–5e. η6-5e-RT denotes the post-current relaxation state. Sample codes correspond to those used in Figs. 1–6.

| Sample Conditions | Nomenclature |
| --- | --- |
| Thermal aging of as-prepared η-Cu6Sn5 (250 °C + 6 h)  Thermal aging of η6 (130 °C + 1–5 h)  Electric current stressing of η6 (1.5103 A/cm2 + 1–5 h)  η6-5e Sample after electric current cessation at RT | η6  η6-LT1, η6-LT2, η6-LT3, η6-LT4, η6-LT5  η6-1e, η6-2e, η6-3e, η6-4e, η6-5e  η6-5e-RT |
|  |  |

Supplementary Table 2: Phase fractions from Rietveld refinement. Refined η/η' phase fractions for η6–LT3, η6–LT5, η6–5e, and η6–5e–RT. Electric-current stressing retains ~100% η, whereas thermal aging samples (η6–LT5) show up to ~41% η'. For η6-LT3, GSAS-II can fit a minor η' fraction, but the corresponding peaks are close to the noise level and strongly overlapping; we therefore treat η' as below the reliable detection limit and report only an upper bound.

| Sample | Condition | η | η' | Comment |
| --- | --- | --- | --- | --- |
| η6–LT3 | 130 °C, 3 h | ~97% | < 3-5% | Weak η' reflections; below the reliable quantification limit. |
| η6–LT5 | 130 °C, 5 h | ~59% | ~41% | Robust η + η' two-phase refinement. |
| η6–5e | ECS, 5 h | ~100% | < 1-2% | No η' peaks. |
| η6–5e–RT | Post-ECS, RT | ~100% | < 1-2% | No η' peaks. |

Supplementary Table 3: Changes in interplanar spacing (d) for selected η6 reflections during 5 h ECS (η6-5e) and after current cessation at room temperature (η6-5e-RT). Values were obtained from SR-XRD peak shifts; positive indicates expansion, negative indicates contraction. The largest change (1.31 % for (002)) corresponds to elastic elongation along the c-axis during ECS.

| Crystal Plane | Changes in d-spacing (Å) | |
| --- | --- | --- |
| in-situ-5h  (η6-5e) | RT  (η6-5e-RT) |
| (101)  (002)  (110)  (102)  (201) | -0.68%  +1.31%  -0.85%  -0.73%  -0.13% | -0.37%  +0.26%  -0.39%  -0.25%  -0.02% |

Supplementary Table 4: Orientation-selective lattice strain, FWHM evolution (from SR-XRD) for η-Cu6Sn5 before and after ECS. Tensile strain along (002) (+1.32 %) and compressive strain on basal planes (−0.8 %) characterize the anisotropic elastic regime. After the current cessation, microstrain recovery (−6 % FWHM reduction) and a ~13 % decrease in ρ(002) in Supplementary Table 5 confirm partial relaxation of electronic stress.

| Parameter | η6 | η6-5e | η6-5e-RT |
| --- | --- | --- | --- |
| *Normal Strain*  ε101  ε002  ε110  ε102  ε201 | -  -  -  -  - | - 0.7%  + 1.32%  - 0.85%  - 0.79%  - 0.15% | - 0.39%  + 0.23%  - 0.43%  - 0.31%  - 0.04% |
| *FWHM (°)*  (101)  (002)  (110)  (102)  (201) | 0.014  0.0191  0.0165  0.0211  0.0199 | 0.0143 (+2%)  0.019 (-0.5%)  0.0166 (+0.6%)  0.0211 (~)  0.0201 (+1%) | 0.0141 (+0.7%)  0.0181 (-6%)  0.0168 (+2%)  0.021 (-0.5%)  0.0198 (-0.5%) |

Supplementary Table 5: Grain-resolved strain components from SR-XND for η-Cu6Sn5 before, during, and after ECS. Mean values were extracted from strain-tensor maps (Fig. 4). Maximum strain magnitudes (≤1.1 %) remain within the elastic regime, indicating reversible lattice deformation as predicted by Liu et al. [19].

| Parameter | η6 | η6-5e | η6-5e-RT | Comments |
| --- | --- | --- | --- | --- |
| Mean a | -0.35% | -0.63% | -0.31% | Compressive in-plane |
| Mean b | -0.40% | -0.87% | -0.34% | Compressive in-plane |
| Mean c | +0.66% | +1.09% | +0.58% | Tensile along c-axis |

Supplementary Table 6: Plane-resolved dislocation density (ρ × 1013 m⁻2) and average principal stress (σ) in η-Cu6Sn5. The (002) plane shows a ~13 % decrease in ρ and an average σ of 33–41 MPa, matching the electron-wind stress σew ≈ 30–40 MPa derived from Z*eρJ. These values confirm elastic accommodation and reversible defect rearrangement during current stressing.

| Plane | Dislocation Density; ρ (1013 1/m2) | | | Average Principal Stress; σ (MPa) | | |
| --- | --- | --- | --- | --- | --- | --- |
| η6 | η6-5e-RT | Δρ (%) | η6 | η6-5e | η6-5e-RT |
| (101) | 90.25 | 9.50.27 | +5.5% | | 36 ± 5 | | --- | | | 80 ± 8 | | --- | | | 39 ± 6 | | --- | |
| (002) | 11.51.2 | 100.96 | -13% | | 33 ± 5 | | --- | | | 78 ± 9 | | --- | | | 41 ± 6 | | --- | |
| (110) | 8.70.5 | 9.50.43 | +9% | | 34 ± 6 | | --- | | 81 ± 10 | | 42 ± 7 | | --- | |

# **Supplementary References**

1. Dolinsky, Y. and T. Elperin, Thermodynamics of nucleation in current-carrying conductors. Physical Review B, 1994. 50(1): p. 52.

2. Dolinsky, Y. and T. Elperin, Melting dynamics in current‐carrying conductors and its effect on electrodynamic characteristics. Journal of applied physics, 1995. 78(4): p. 2253-2259.

3. Ding, C., J. Wang, T. Liu, H. Qin, D. Yang, and G. Zhang, The mechanical properties and elastic anisotropy of η′-Cu6Sn5 and Cu3Sn intermetallic compounds. Crystals, 2021. 11(12): p. 1562.

4. Wu, J., Y. Chiu, Y. Wang, and C. Kao, Mechanical characterizations of single-crystalline (Cu, Ni) 6Sn5 through uniaxial micro-compression. Materials Science and Engineering: A, 2019. 753: p. 22-30.

5. Cui, Z., Multi-physics driven electromigration study: multi-scale modeling and experiment. 2021.

6. Lin, S.-k., S. Mukherjee, Y.-c. Liu, and J. Mizuno, Electric Current-Induced Monoclinic-to-Hexagonal Phase Transition of Cu6Sn5 at Low Temperatures. Available at SSRN 5405047.

7. Mukherjee, S. and S.-k. Lin. Impact of Electrical Current Stressing on η'-Cu 6 Sn 5 in Electronics Packaging. in 2024 19th International Microsystems, Packaging, Assembly and Circuits Technology Conference (IMPACT). 2024. IEEE.

8. Mukherjee, S., Y.-C. Liu, and S.-K. Lin. Phase Transitions of the CU 6 Sn 5 Phase Under Electric Currents. in 2025 International Conference on Electronics Packaging and iMAPS All Asia Conference (ICEP-IAAC). 2025. IEEE.

9. Akhmetov, F., I. Milov, I.A. Makhotkin, M. Ackermann, and J. Vorberger, Electron-phonon coupling in transition metals beyond Wang's approximation. Physical Review B, 2023. 108(21): p. 214301.

10. Otto, M.R., J.-H. Pöhls, L.P. René de Cotret, M.J. Stern, M. Sutton, and B.J. Siwick, Mechanisms of electron-phonon coupling unraveled in momentum and time: The case of soft phonons in TiSe2. Science Advances, 2021. 7(20): p. eabf2810.

11. Dolinsky, Y. and T. Elperin, Thermodynamics of phase transitions in current-carrying conductors. Physical Review B, 1993. 47(22): p. 14778.

12. Lin, S.-k., C.-k. Yeh, W. Xie, Y.-c. Liu, and M. Yoshimura, Ab initio-aided CALPHAD thermodynamic modeling of the Sn-Pb binary system under current stressing. Scientific reports, 2013. 3(1): p. 2731.

13. Huntington, H. and A. Grone, Current-induced marker motion in gold wires. Journal of Physics and Chemistry of Solids, 1961. 20(1-2): p. 76-87.

14. Mecklenburg, M., B.T. Zutter, X.Y. Ling, W.A. Hubbard, and B. Regan, Visualizing the electron wind force in the elastic regime. Nano letters, 2021. 21(24): p. 10172-10177.

15. Wei, C., C. Chen, P. Liu, and C. Chen, Electromigration in Sn–Cu intermetallic compounds. Journal of applied physics, 2009. 105(2).

16. Chen, X., C. Dejoie, T. Jiang, C.-S. Ku, and N. Tamura, Quantitative microstructural imaging by scanning Laue x-ray micro-and nanodiffraction. MRS bulletin, 2016. 41(6): p. 445-453.

17. Lee, P.-T., W.-Z. Hsieh, C.-Y. Lee, Y.-H. Huang, C.-Y. Chiang, C.-S. Ku, C. Kao, and C.-E. Ho, Synchrotron white Laue nanodiffraction study on the allotropic phase transformation between hexagonal and monoclinic Cu6Sn5. Journal of Materials Research and Technology, 2021. 13: p. 1316-1322.

18. Tamura, N., XMAS: A versatile tool for analyzing synchrotron X-ray microdiffraction data, in Strain and dislocation gradients from diffraction: Spatially-Resolved Local Structure and Defects. 2014, World Scientific. p. 125-155.

19. Liu, Y.-c., S.-k. Lin, and S.-J. Chiu, On the Schmid's Law for the electric current-induced deformation: An in situ EBSD study. International Journal of Mechanical Sciences, 2020. 168: p. 105295.
